# Supplementary material for: Single‐cell transcriptomics reveal the intratumoral landscape of infiltrated T‐cell subpopulations in oral squamous cell carcinoma
Source: PubMed Central journal article supplement (PMC8024729; doi:10.1002/1878-0261.12910), 2021-03-09

**CD3E**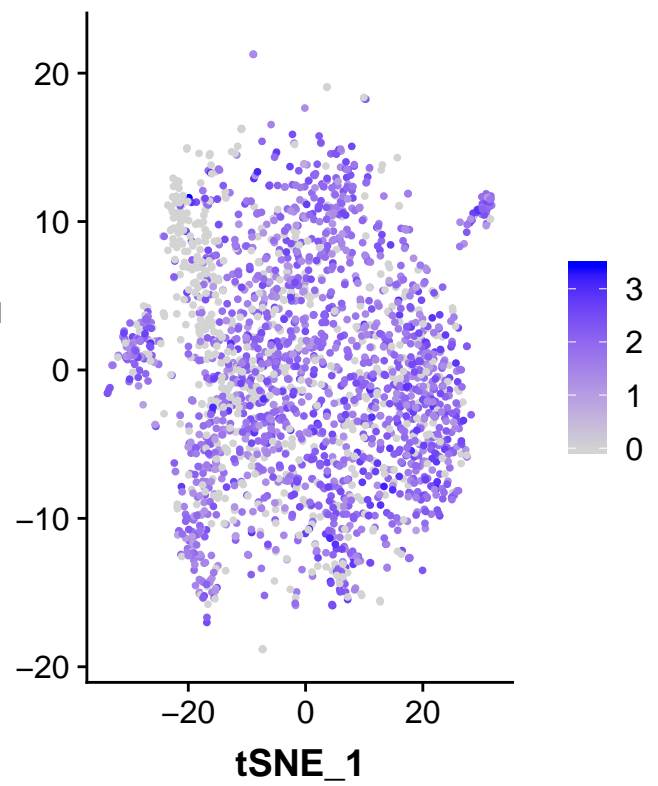**CD8A**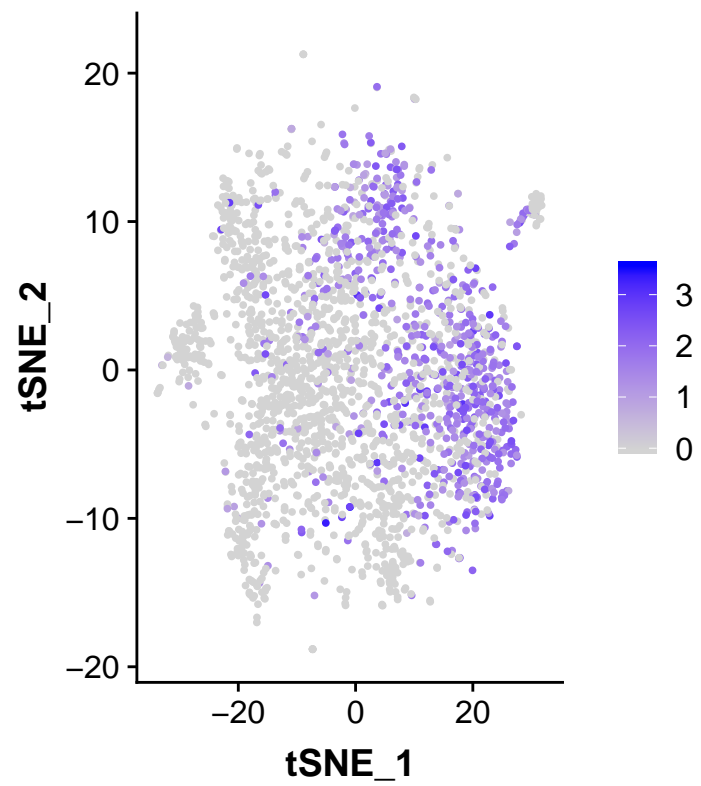**CD4**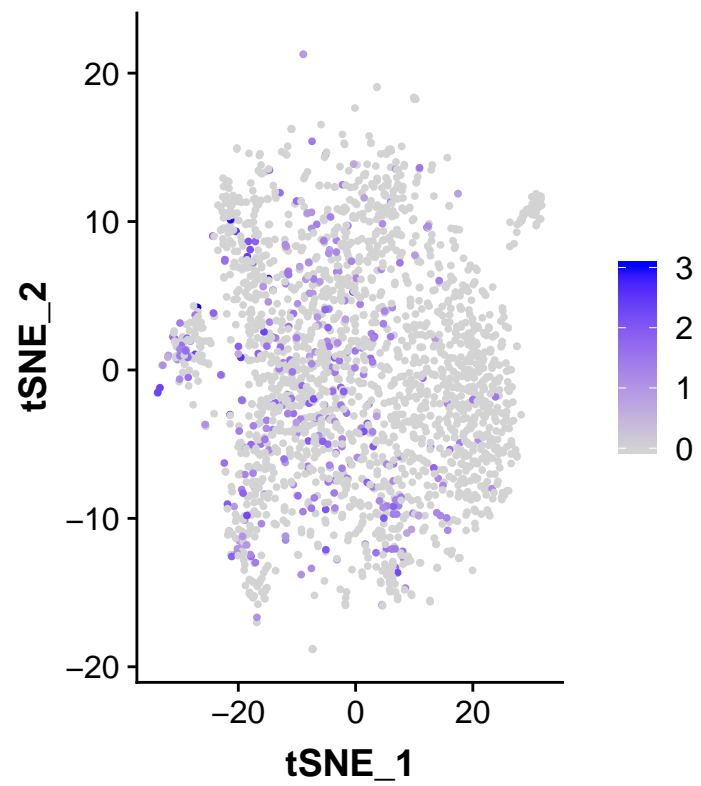**CD14**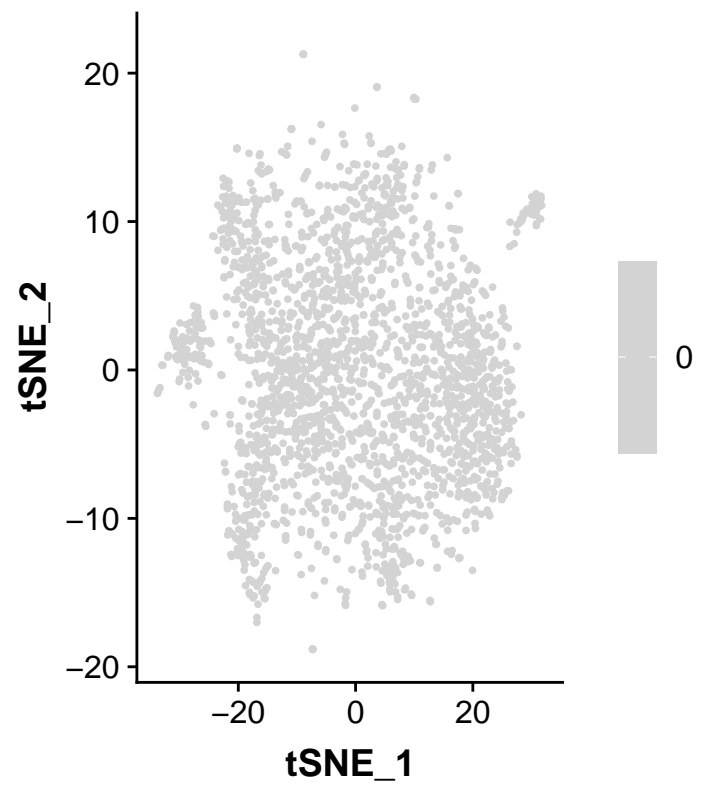**FOXP3**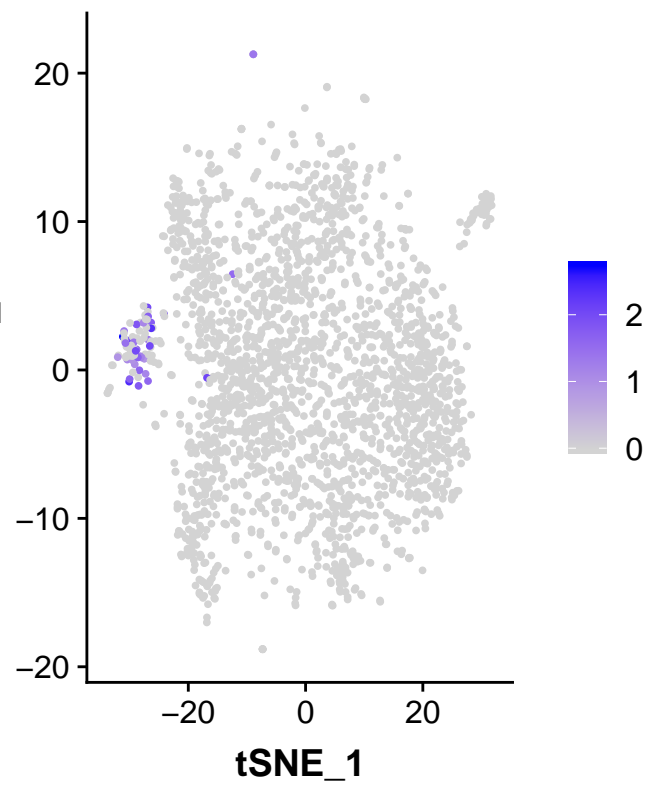**LAG3**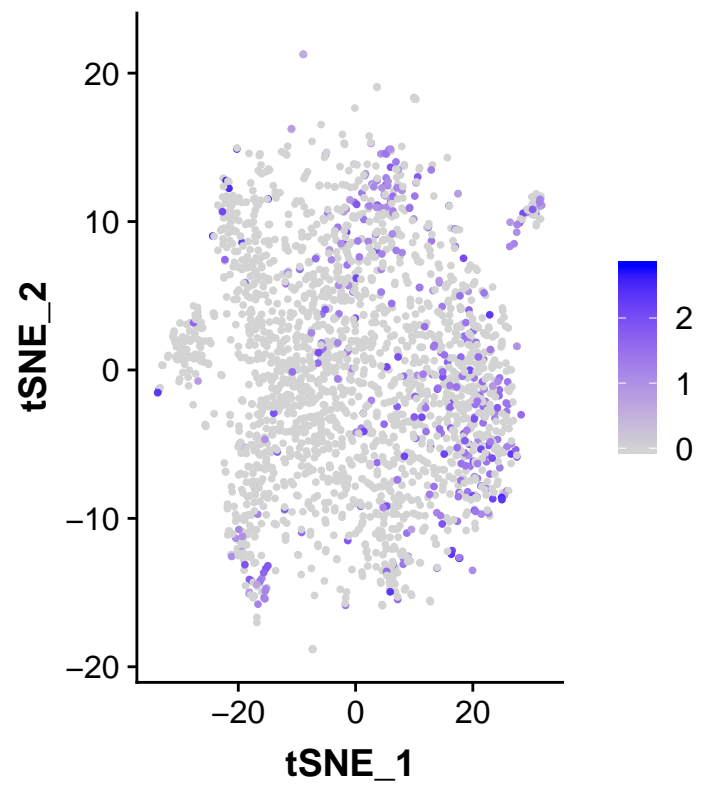**PDCD1**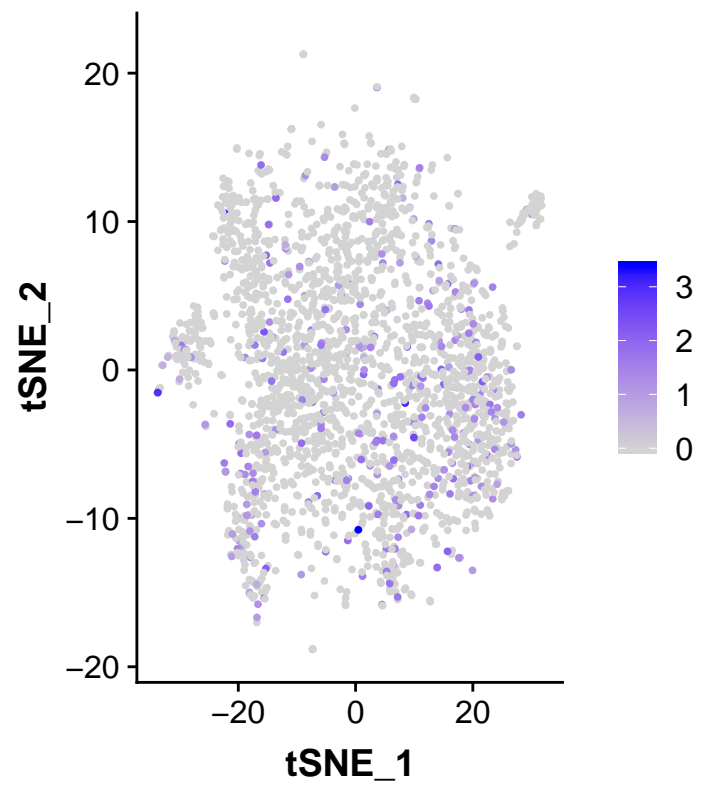**CTLA4**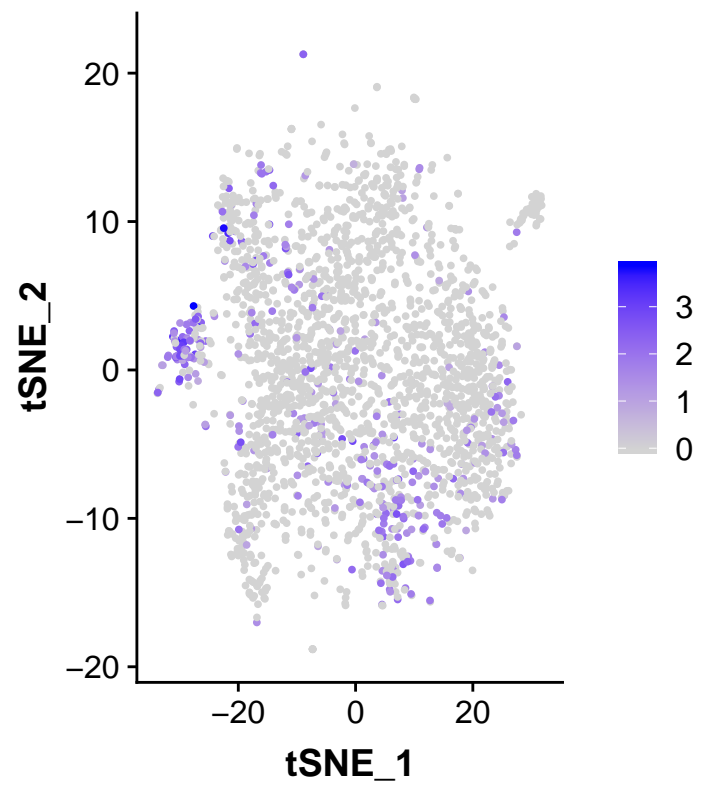**MKI67**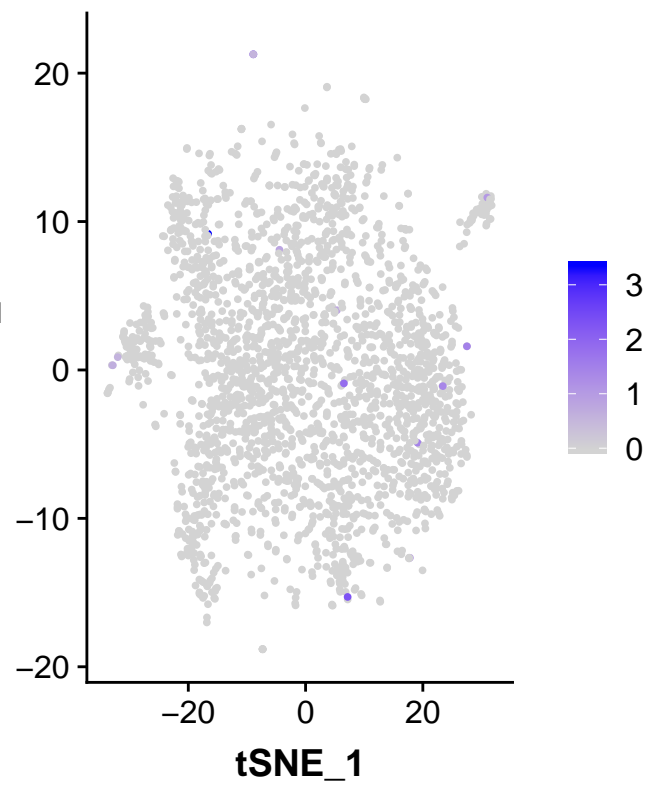**GZMA**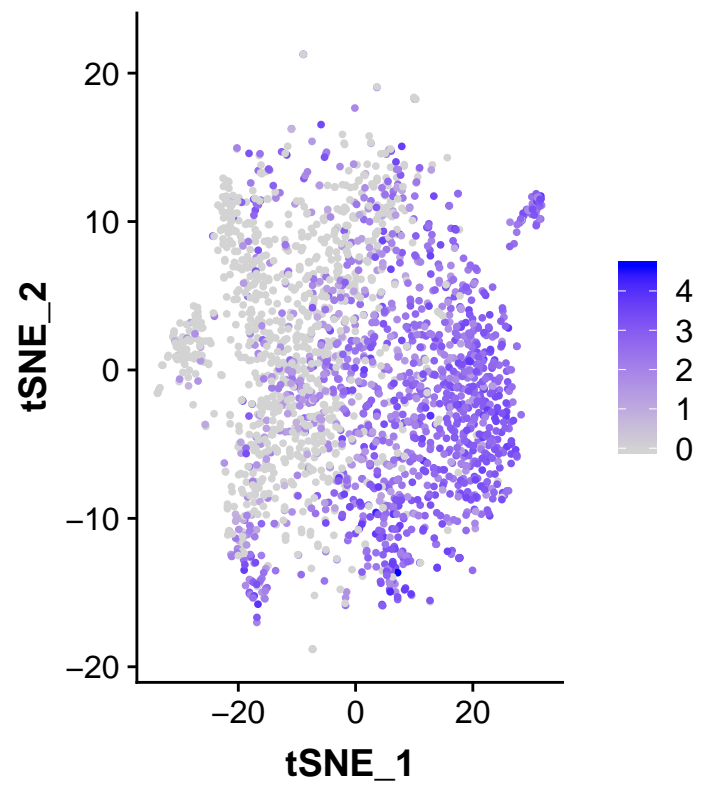**GZMB**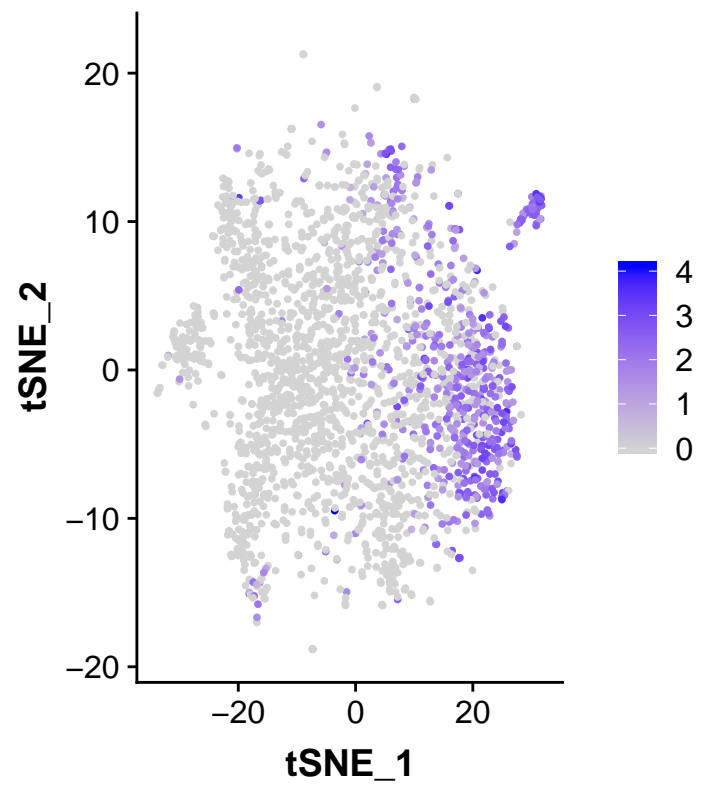**HMGB2**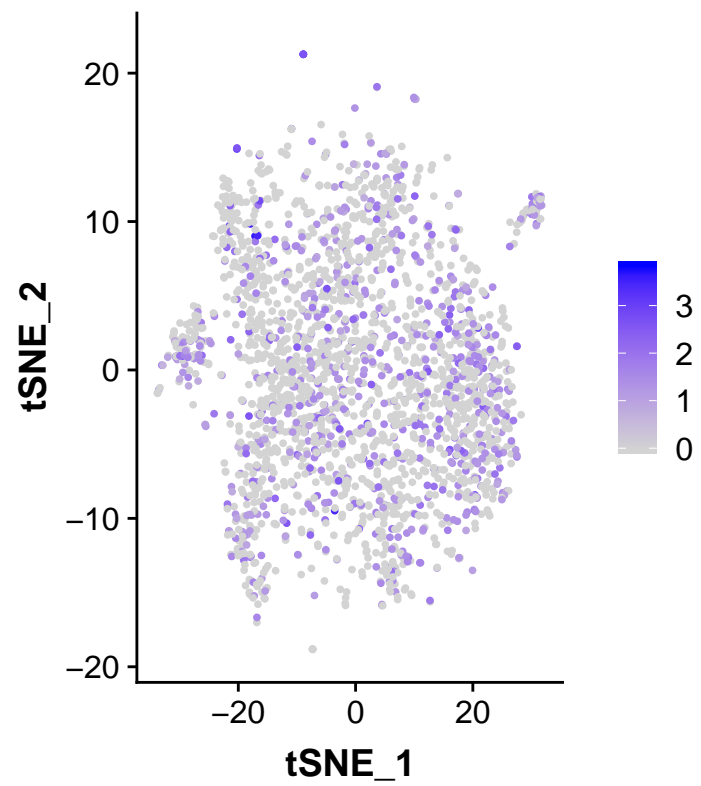**STMN1**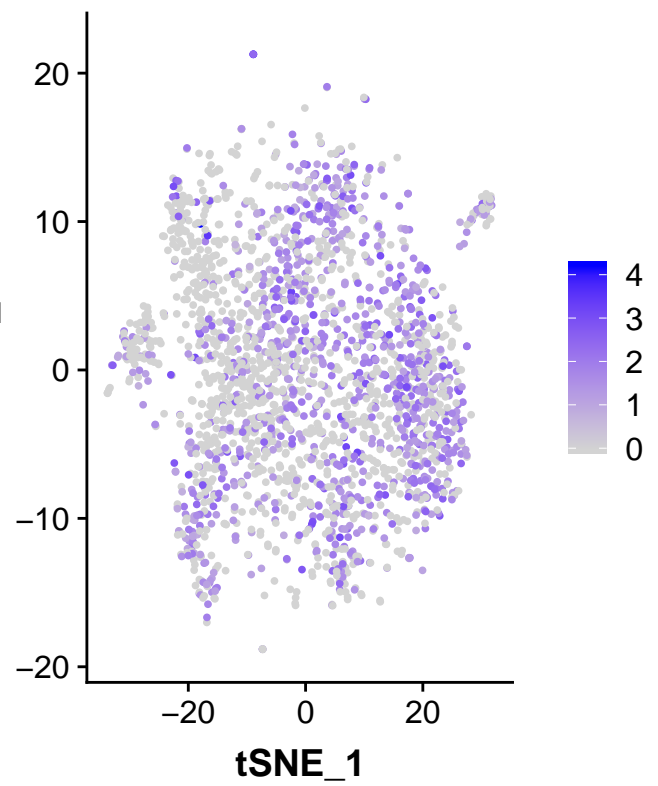**MKI67**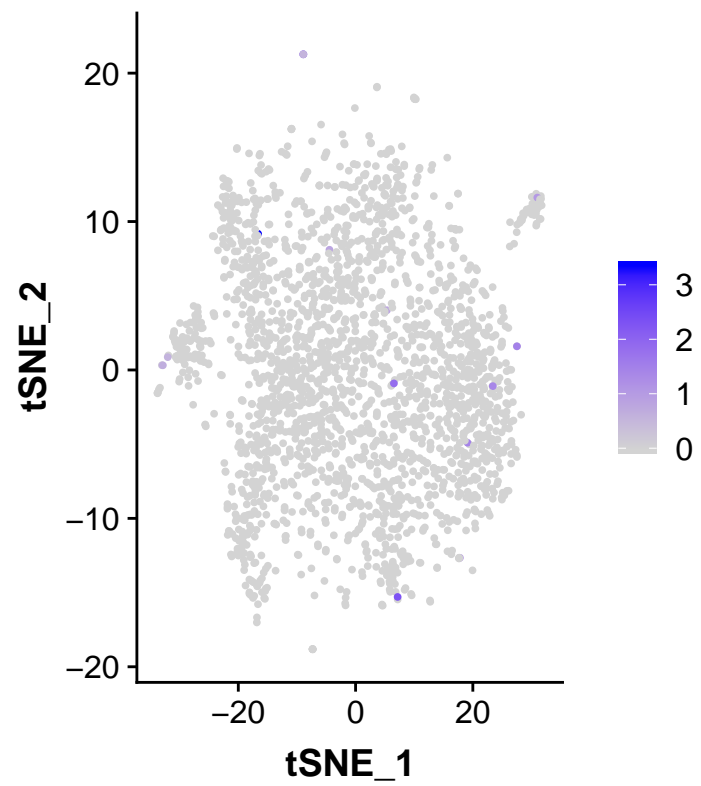**GINS2**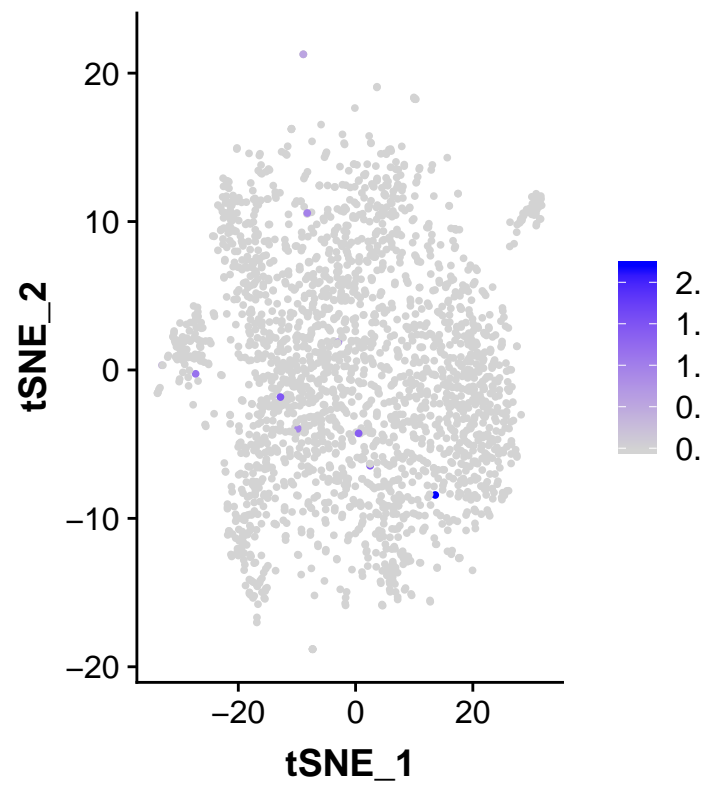

Supplement: MOL2-15-866-s006.pdf [file MOL2-15-866-s006.pdf]
