# Supplementary material for: Single‐cell transcriptomics reveal the intratumoral landscape of infiltrated T‐cell subpopulations in oral squamous cell carcinoma
Source: PubMed Central journal article supplement (PMC8024729; doi:10.1002/1878-0261.12910), 2021-03-09

A

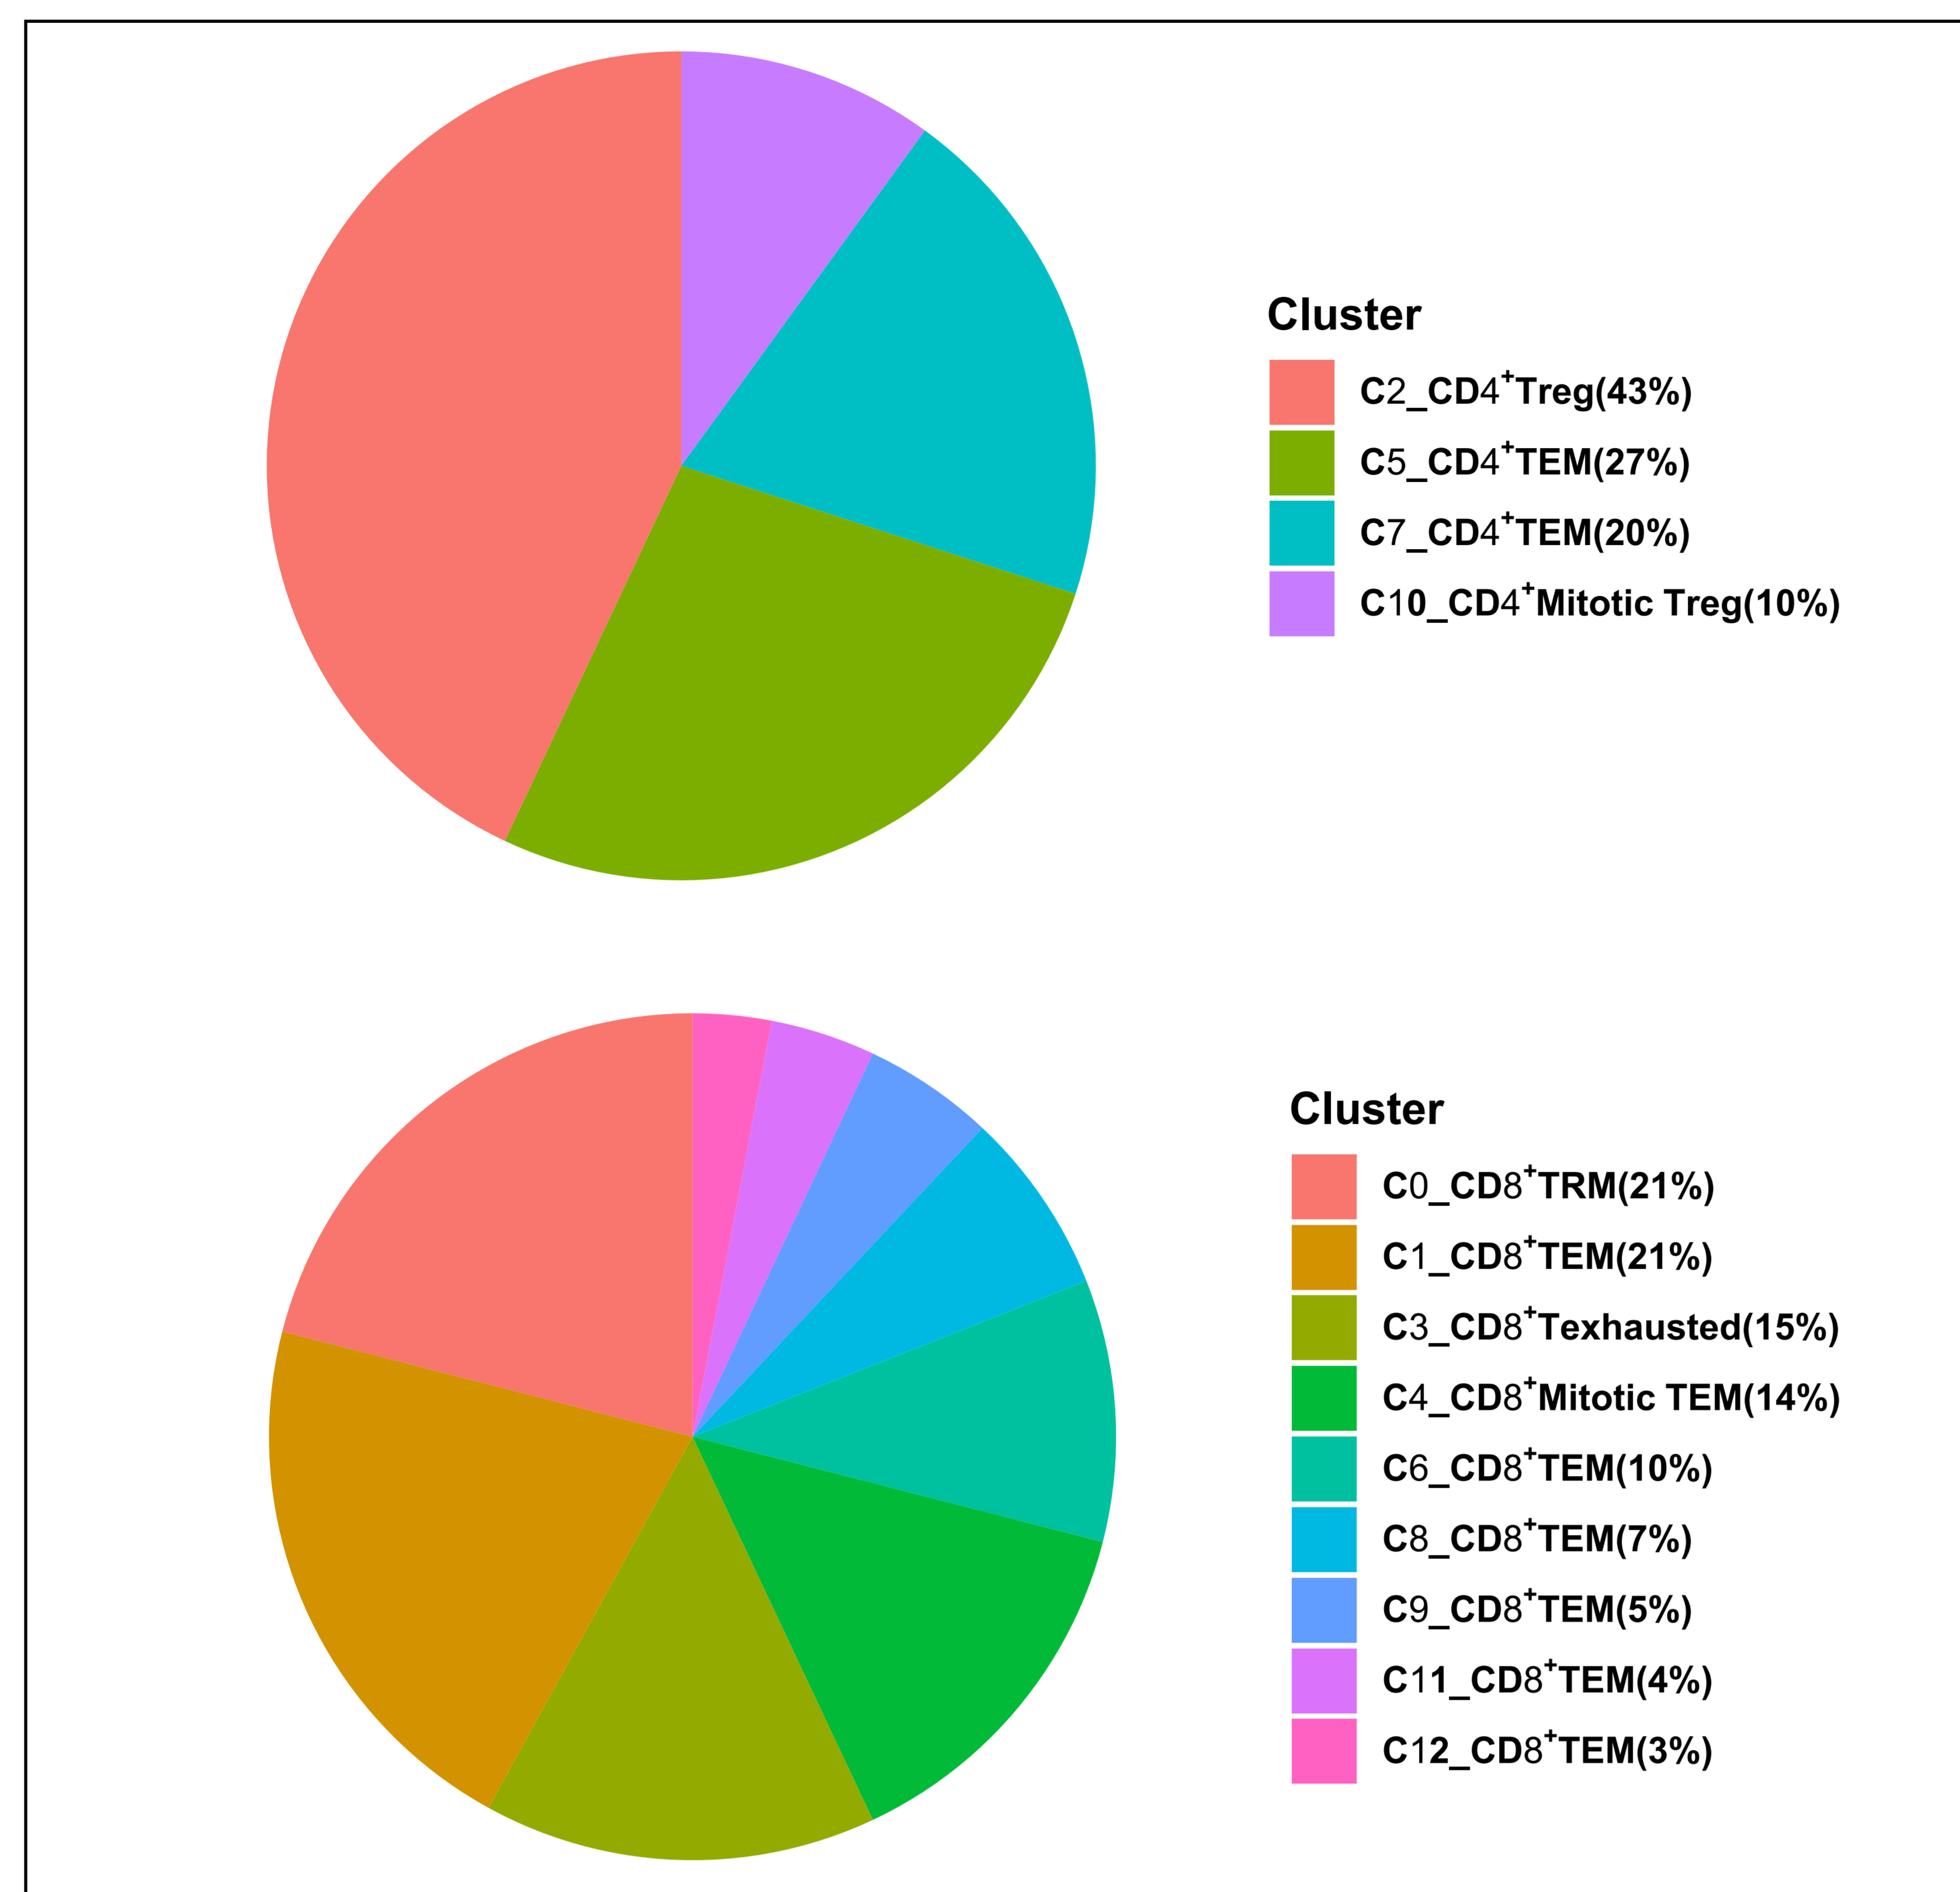

B

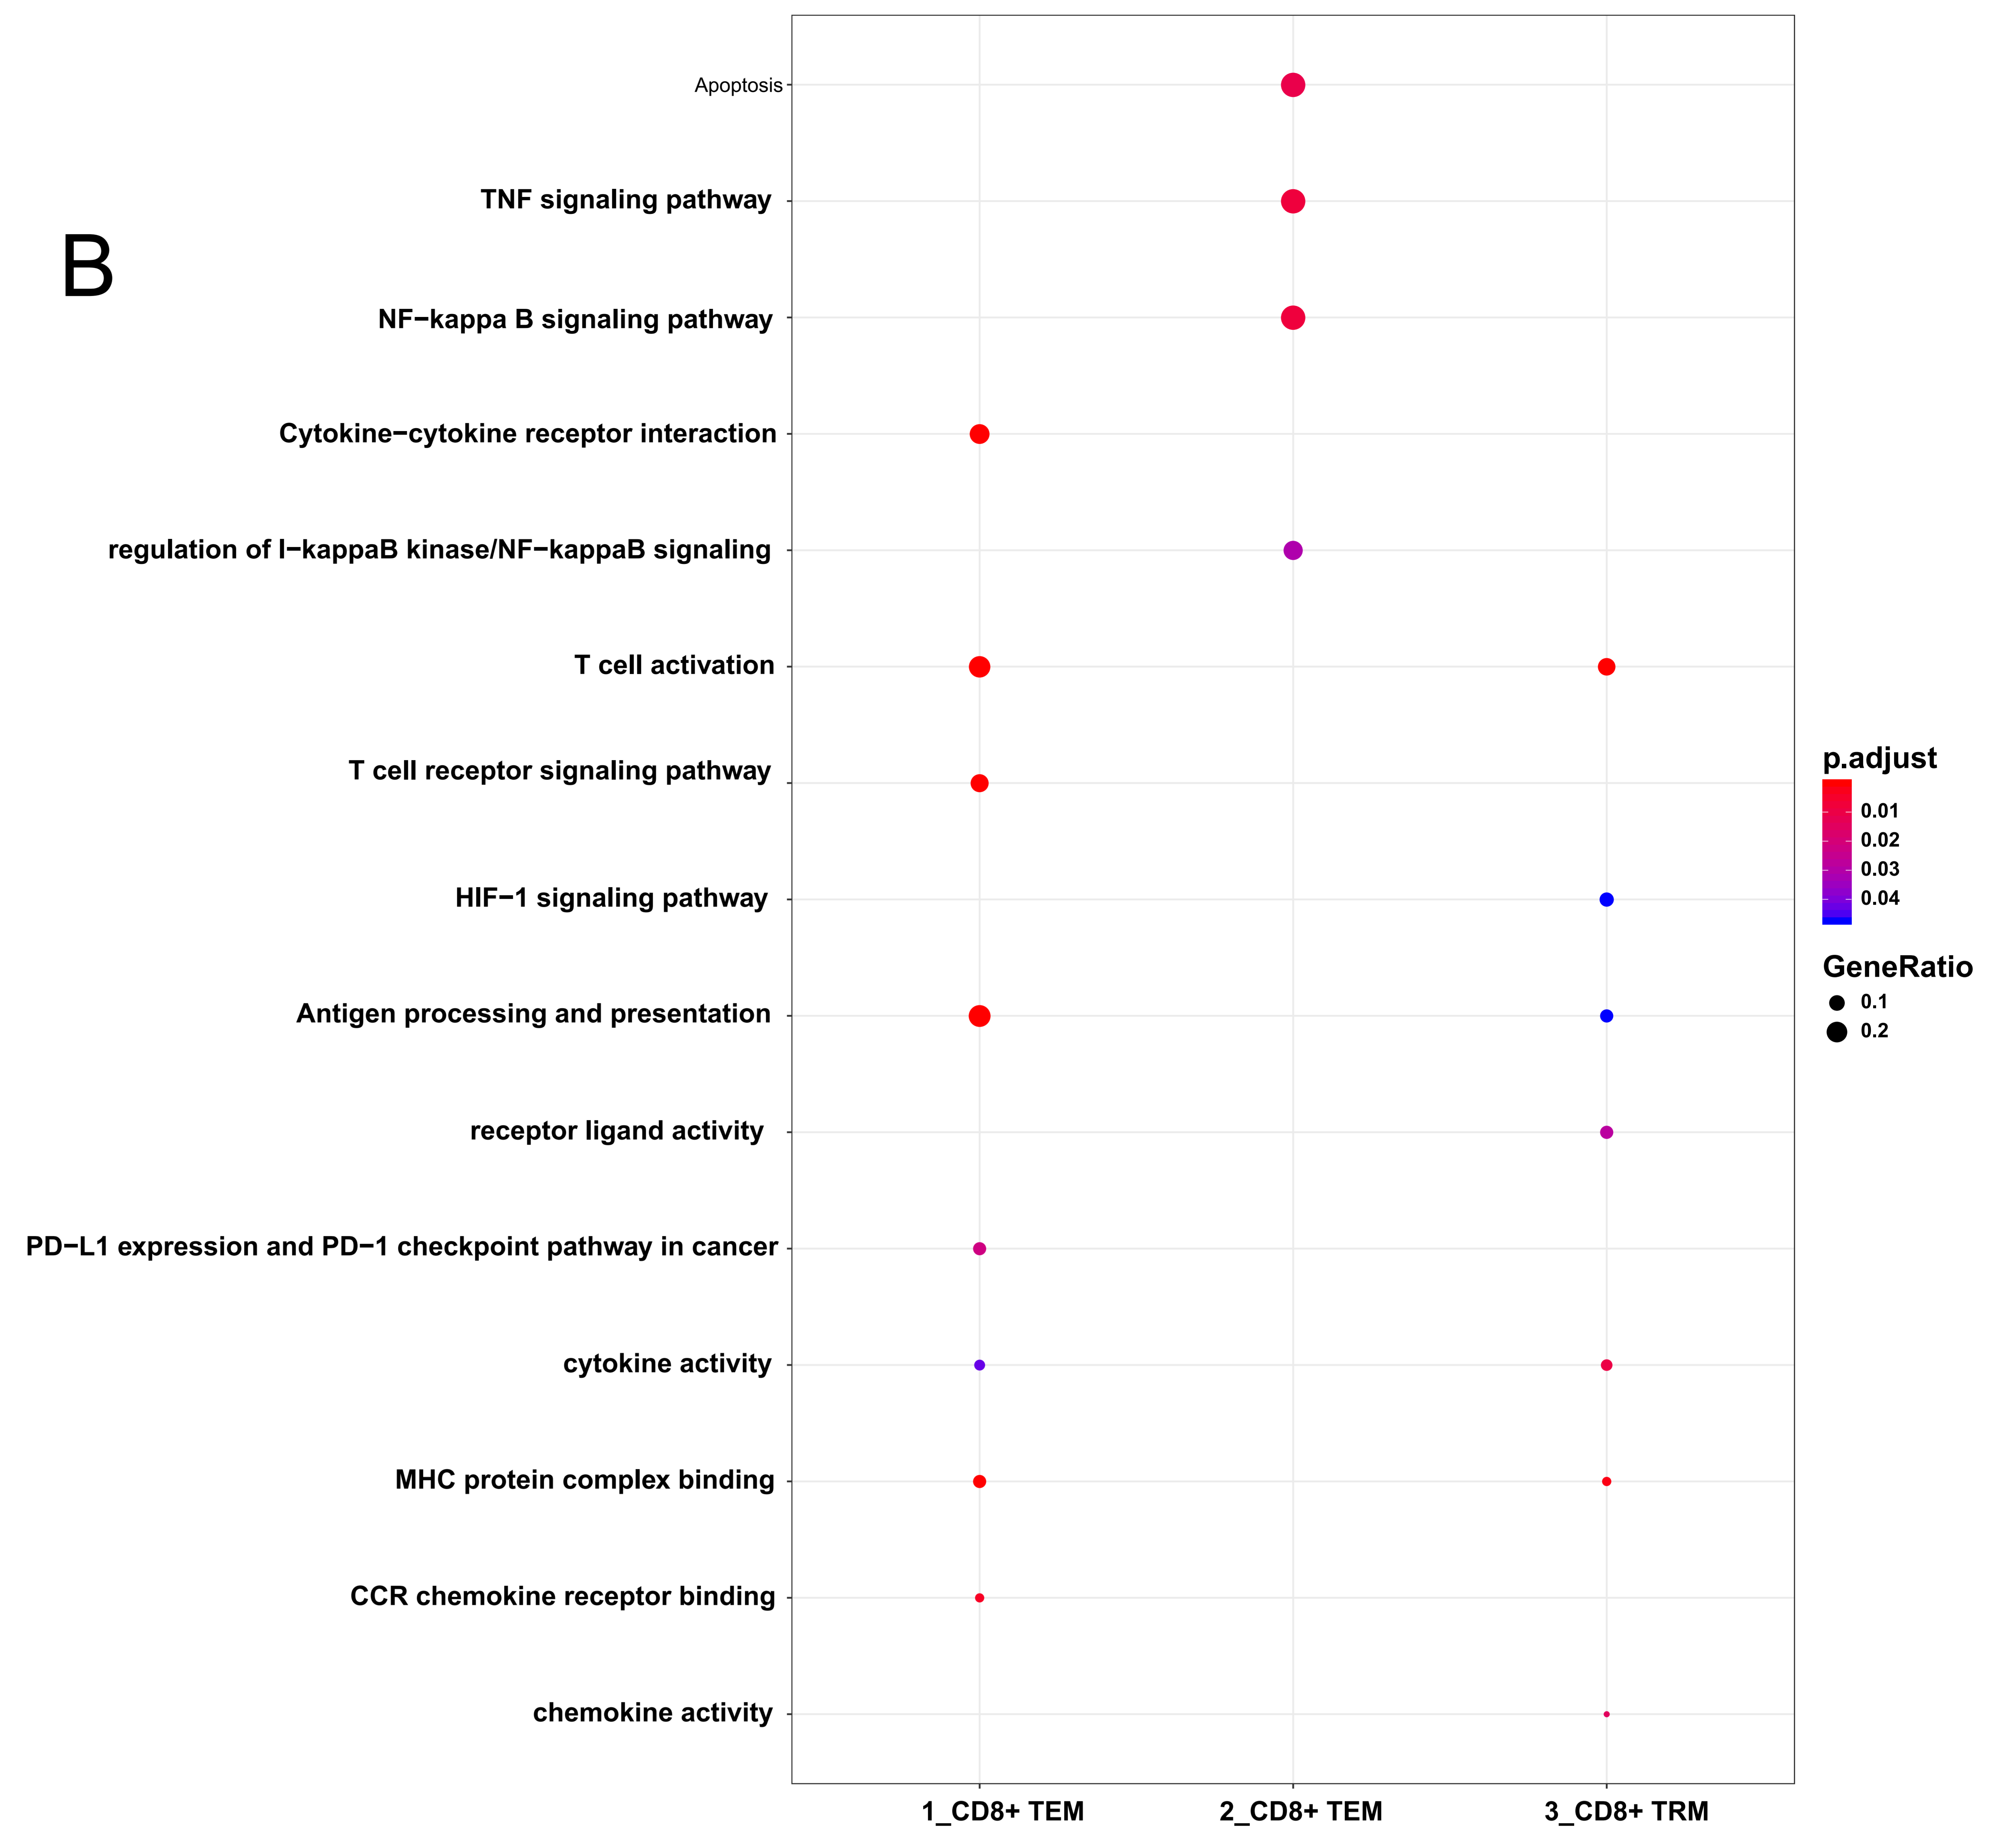

C

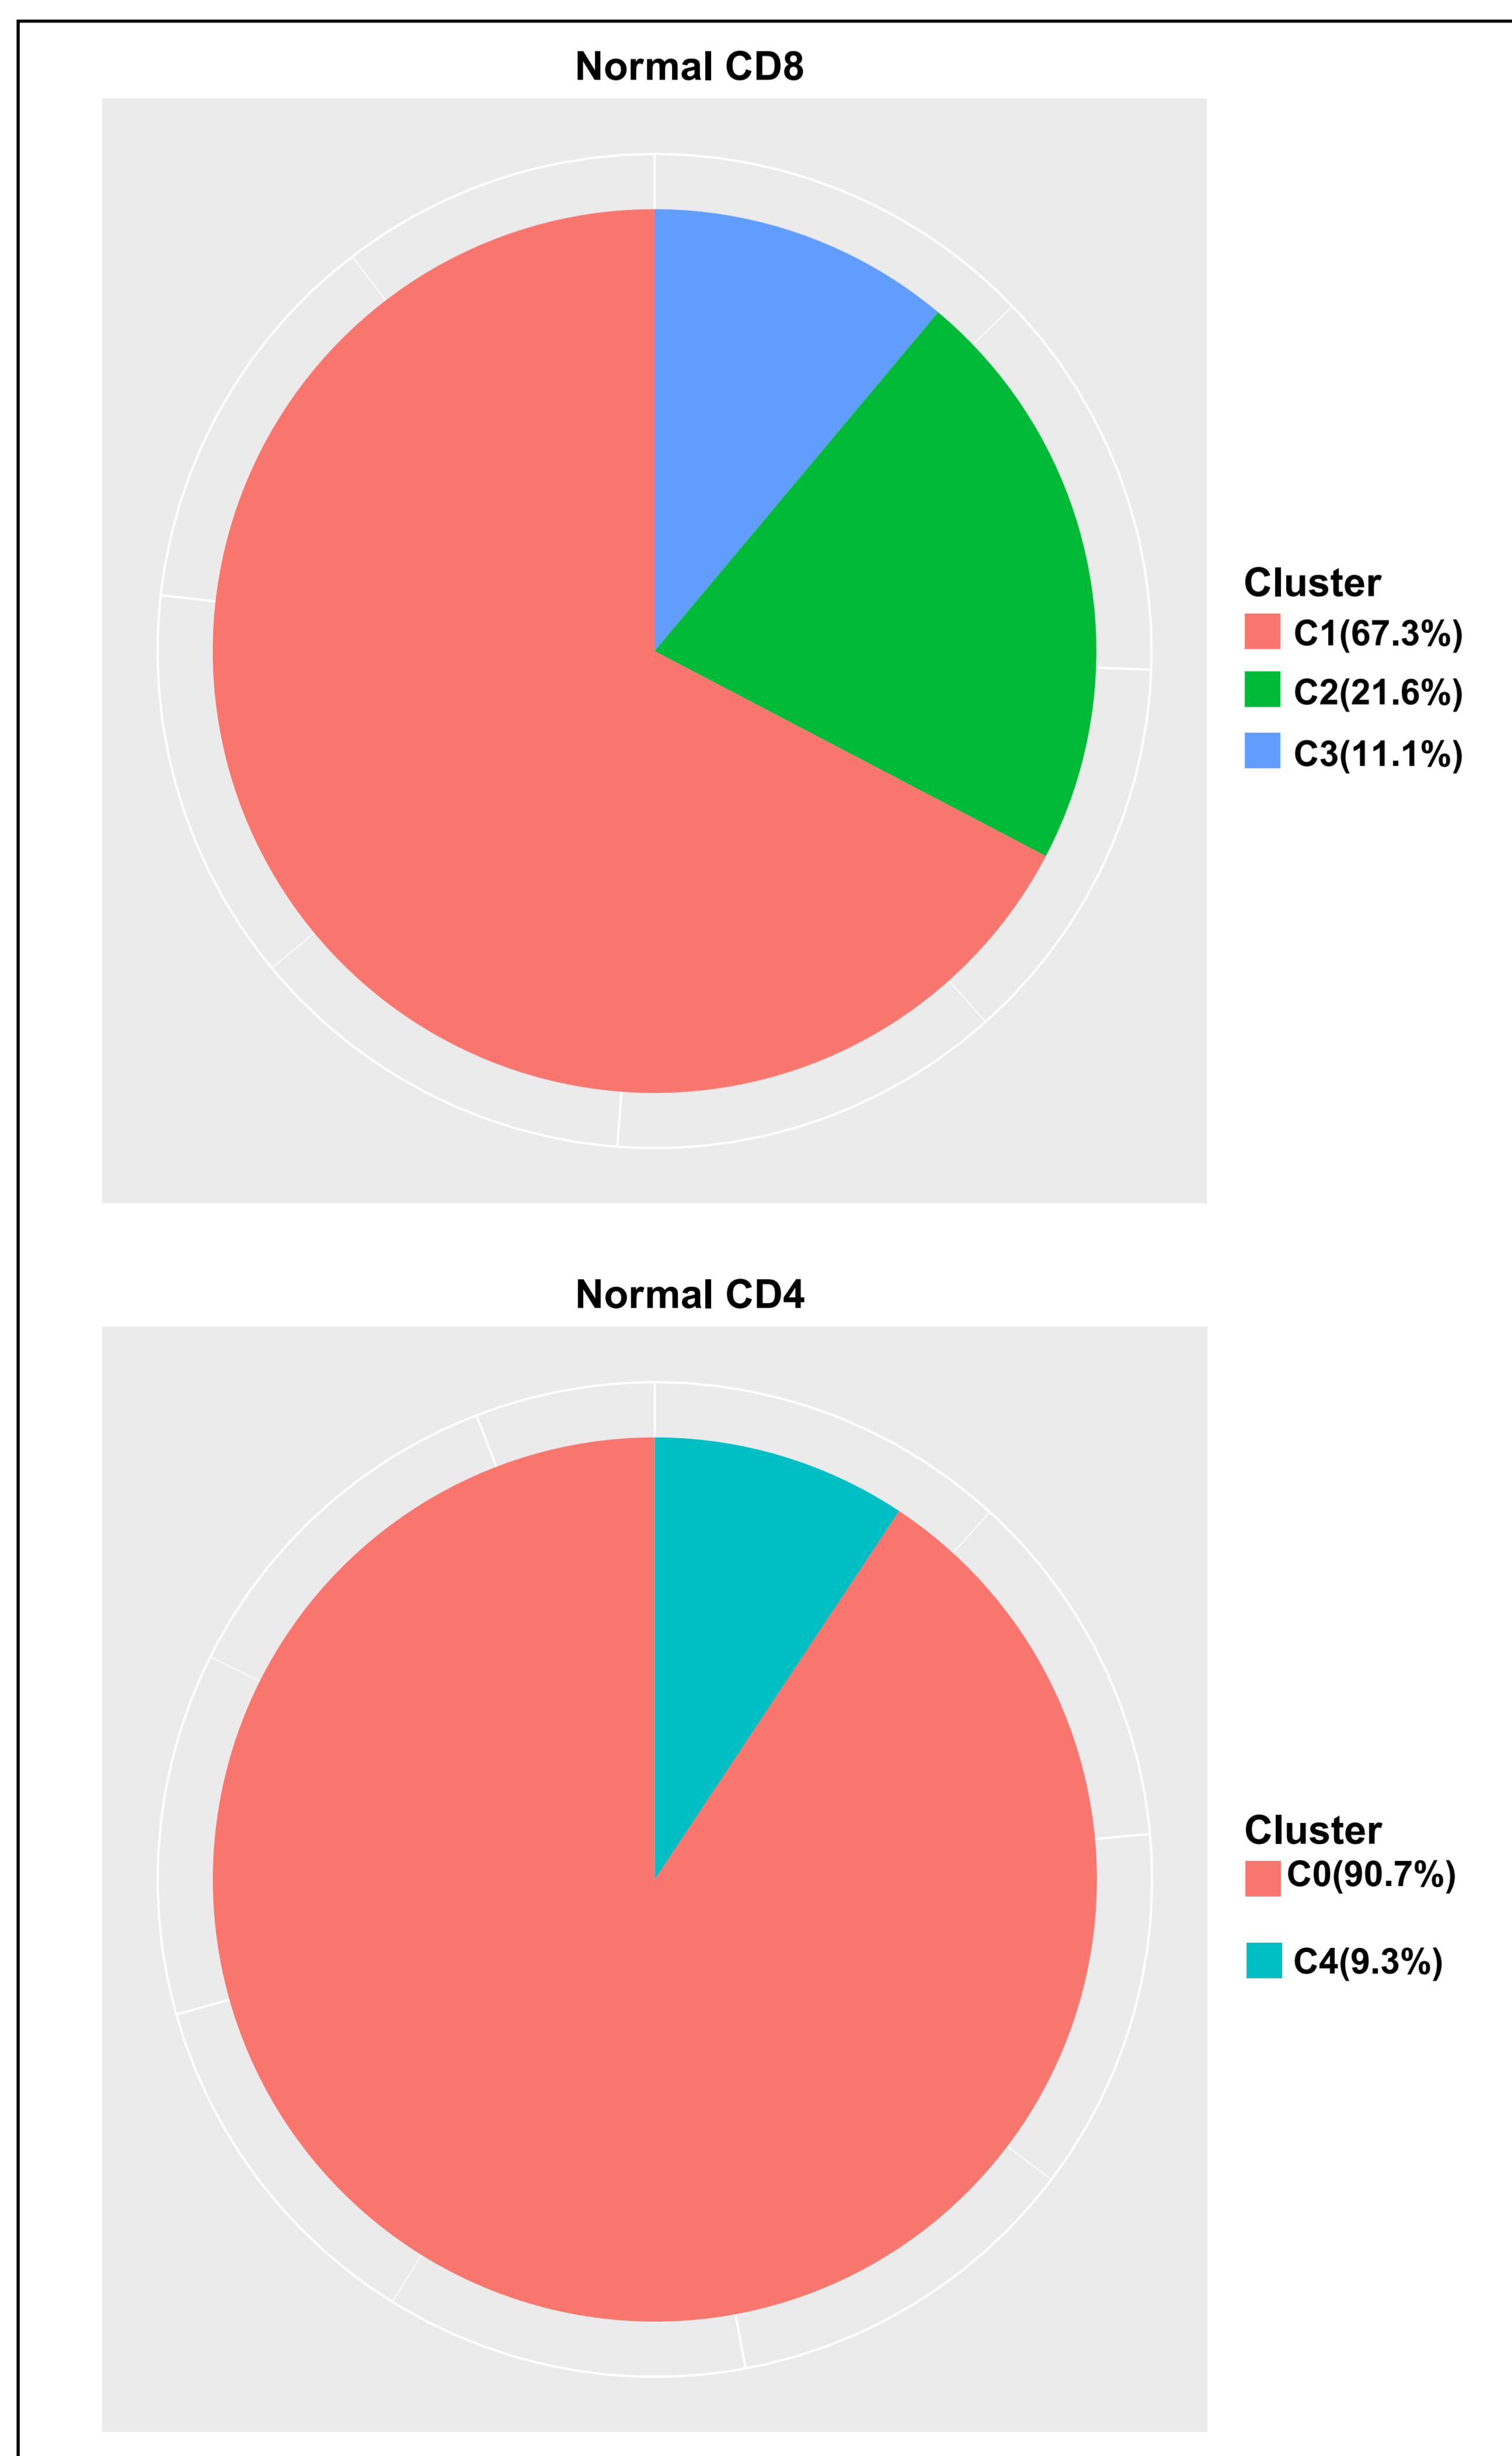

D

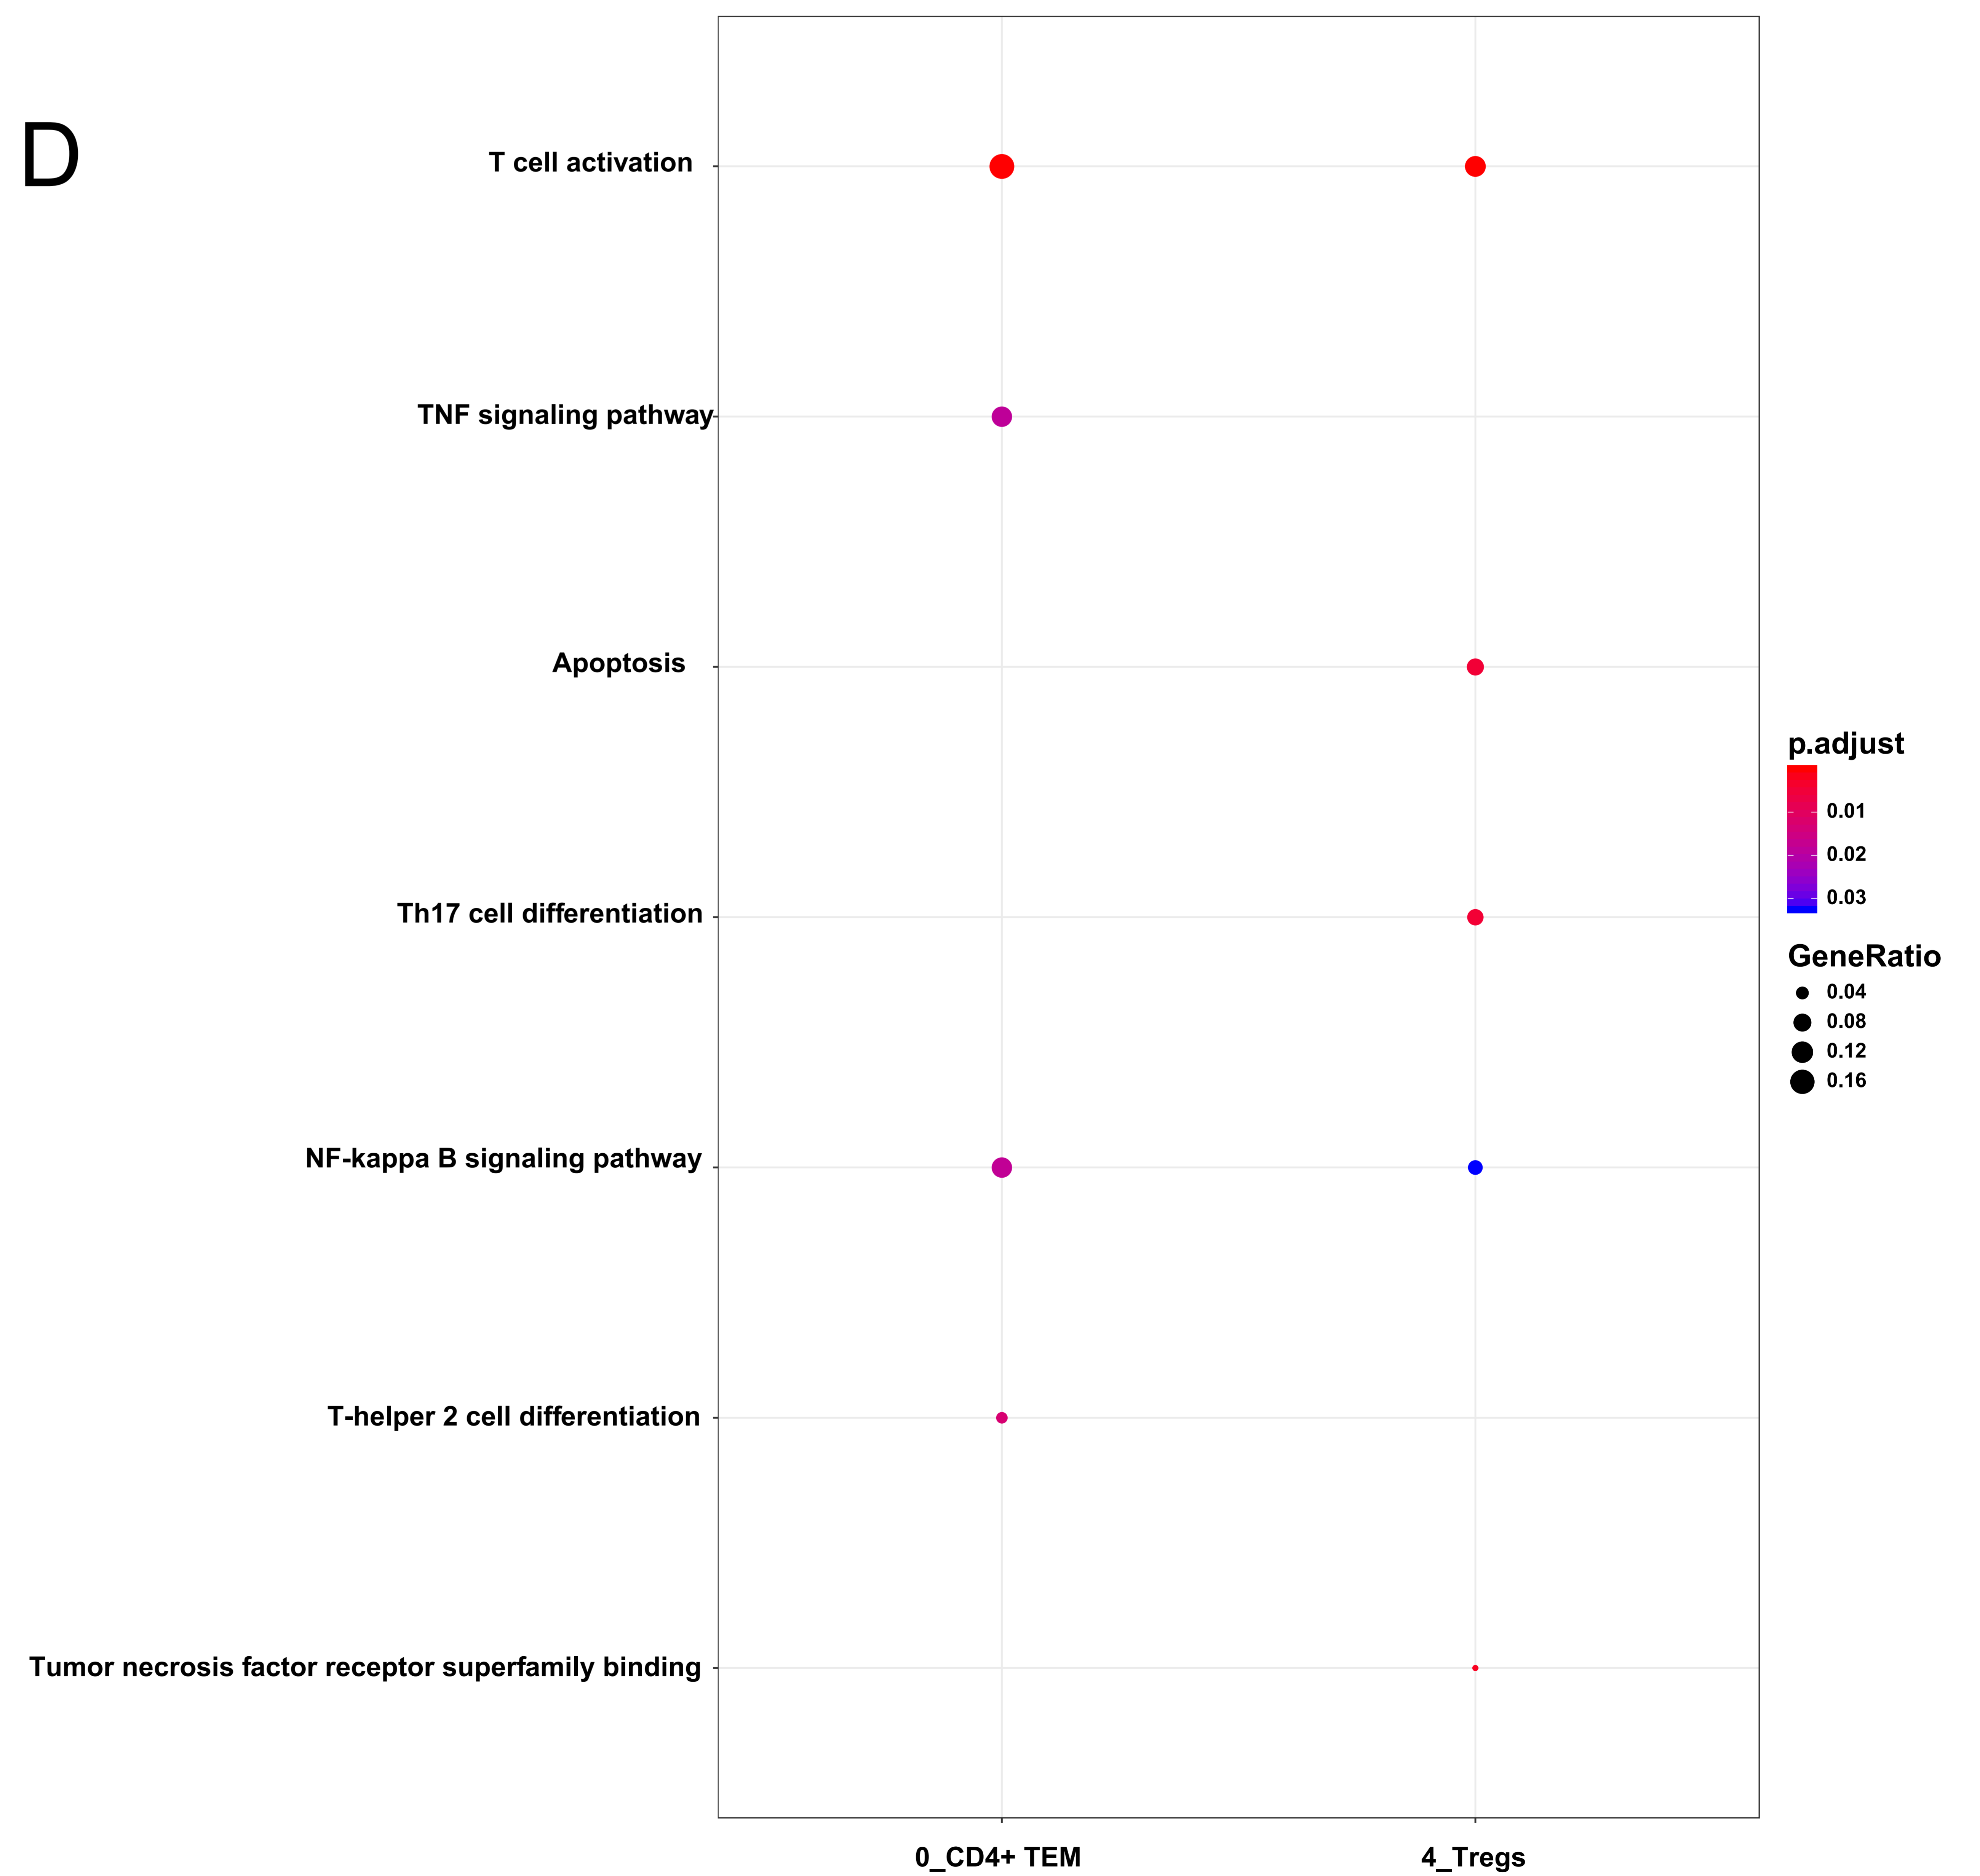

Supplement: MOL2-15-866-s010.pdf [file MOL2-15-866-s010.pdf]
