# Supplementary material for: Single‐cell transcriptomics reveal the intratumoral landscape of infiltrated T‐cell subpopulations in oral squamous cell carcinoma
Source: PubMed Central journal article supplement (PMC8024729; doi:10.1002/1878-0261.12910), 2021-03-09

A

| Gene    | R        | P value |
|---------|----------|---------|
| CXCL13  | 0.261706 | 0       |
| GAPDH   | 0.226496 | 0       |
| CHN1    | 0.223833 | 0       |
| PDCD1   | 0.211736 | 0       |
| RBPJ    | 0.202733 | 0       |
| TNFRSF9 | 0.195307 | 0       |
| RGS1    | 0.193451 | 0       |
| CTLA4   | 0.188283 | 0       |
| TIGIT   | 0.186564 | 0       |

B

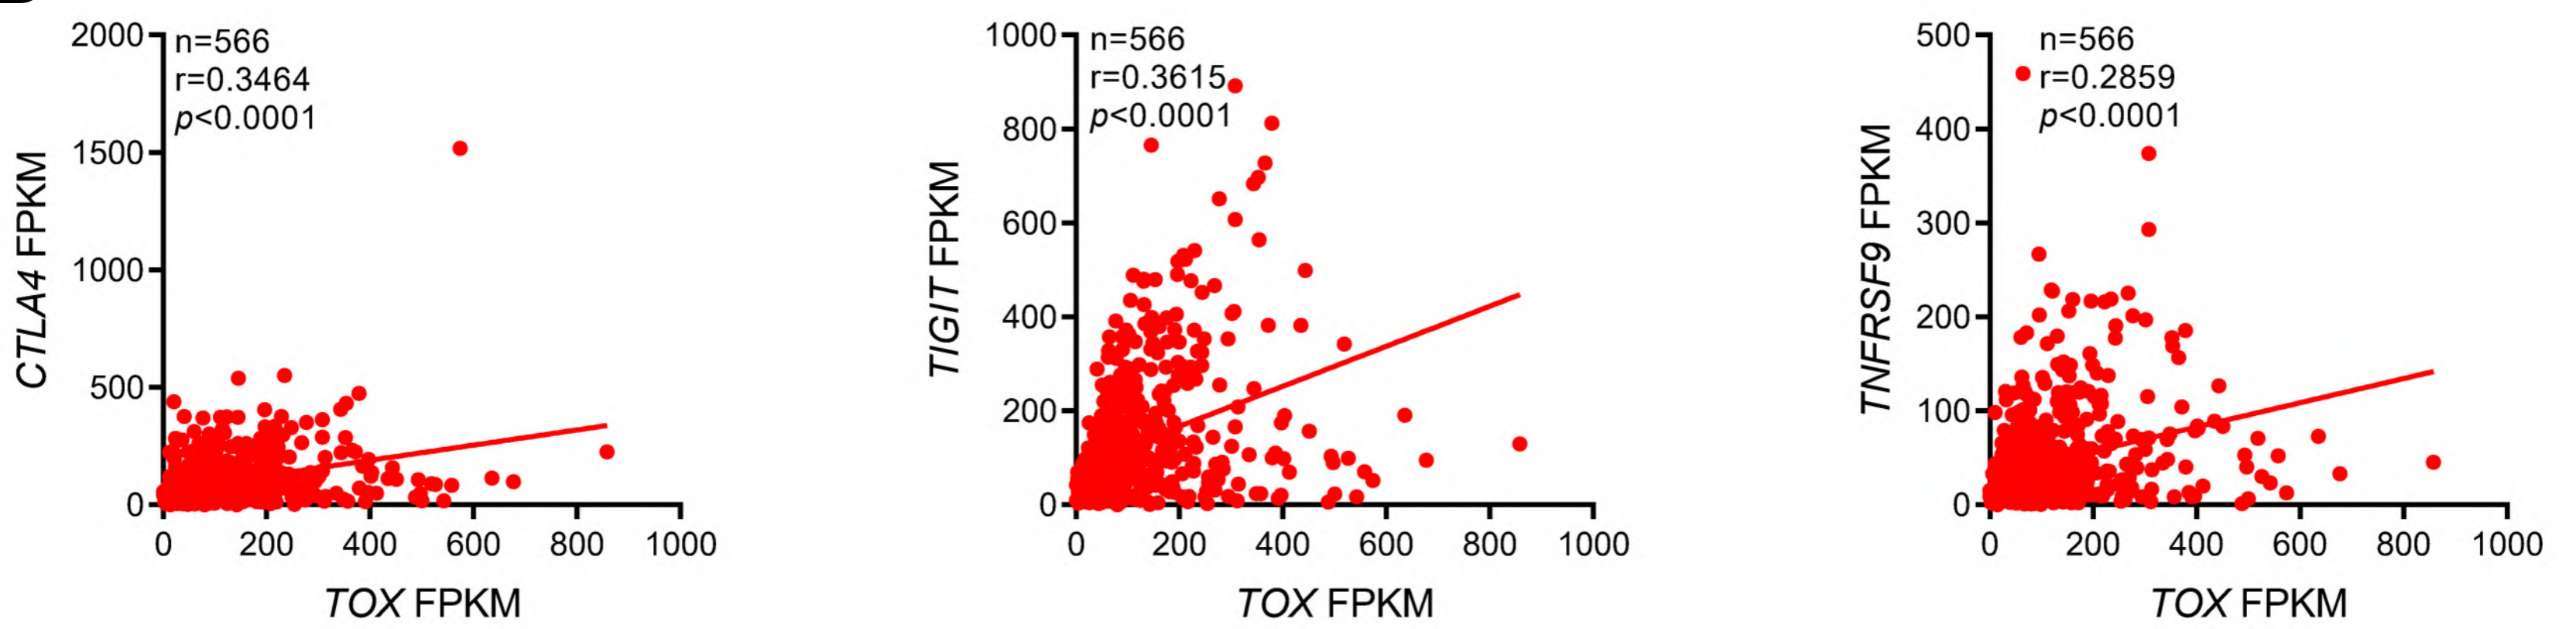

C

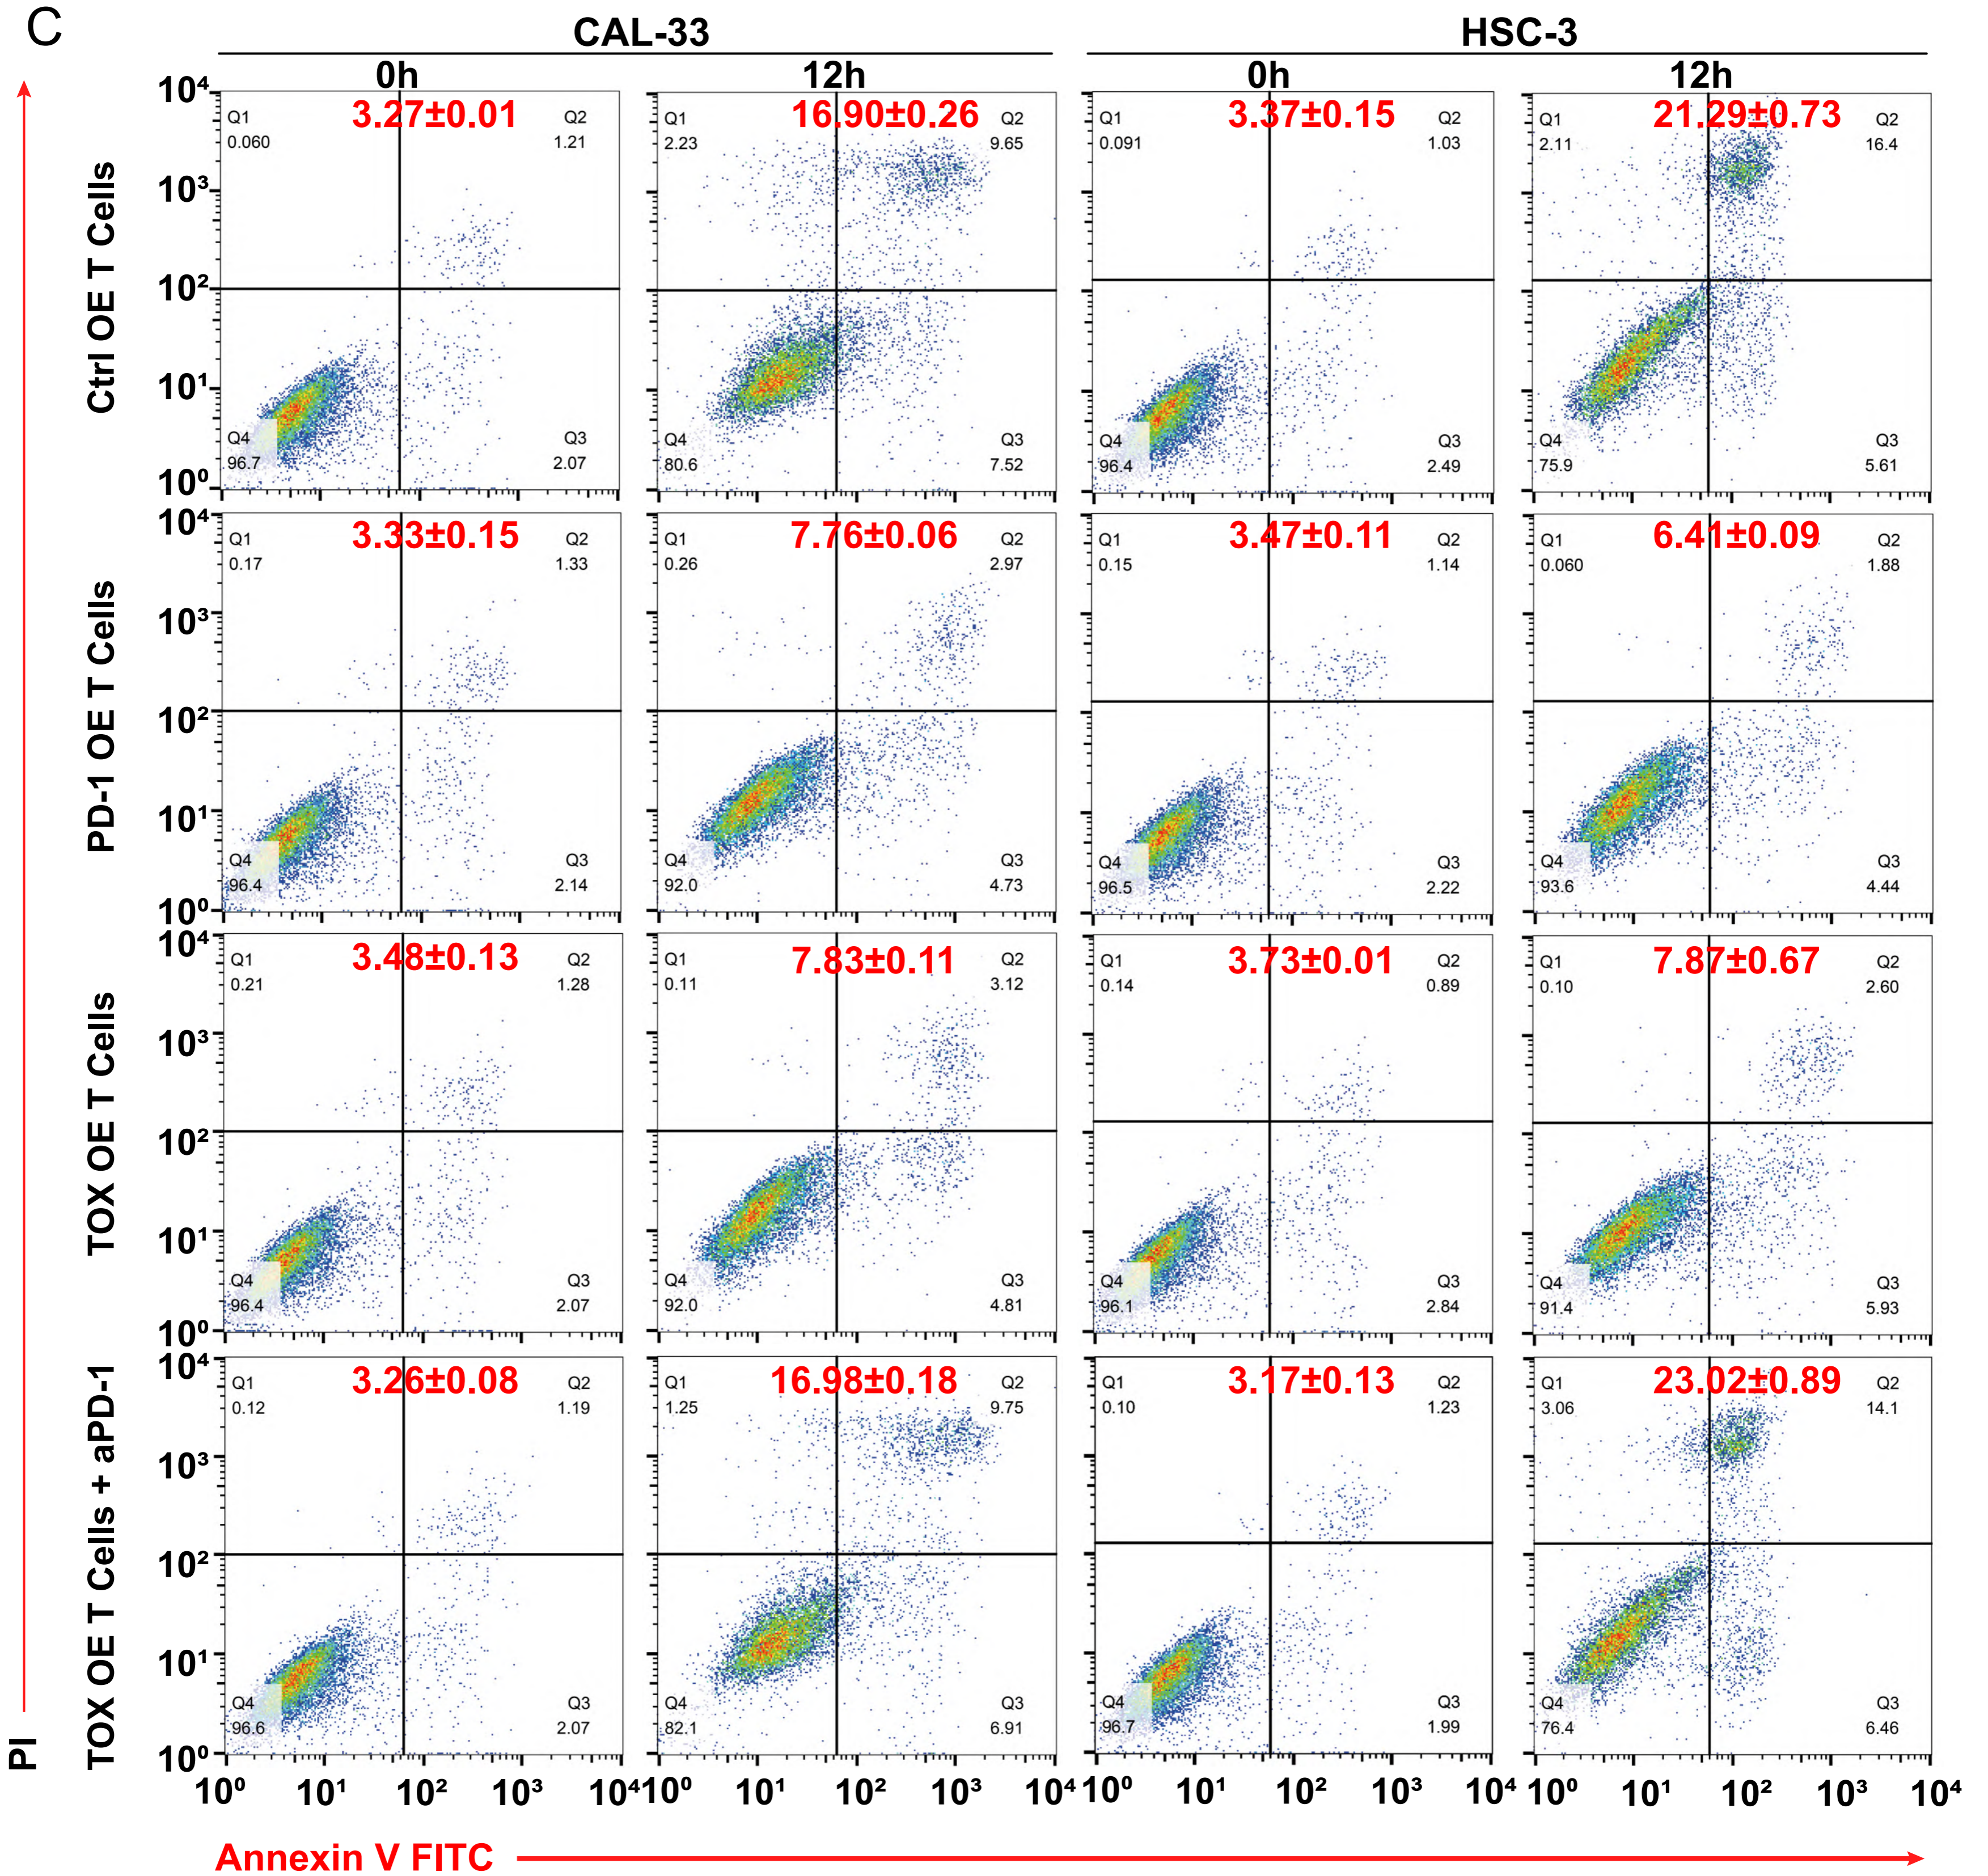

Supplement: MOL2-15-866-s012.pdf [file MOL2-15-866-s012.pdf]
